# Supplementary material for: Analysis of Allergen-Specific T Cell and IgE Reactivity to Different Preparations of Cow’s Milk-Containing Food Extracts
Source: PubMed Central journal article supplement (PMC6679079; doi:10.3390/cells8070667), 2019-07-02
Supplement: cells-08-00667-s001.pdf [file cells-08-00667-s001.pdf]

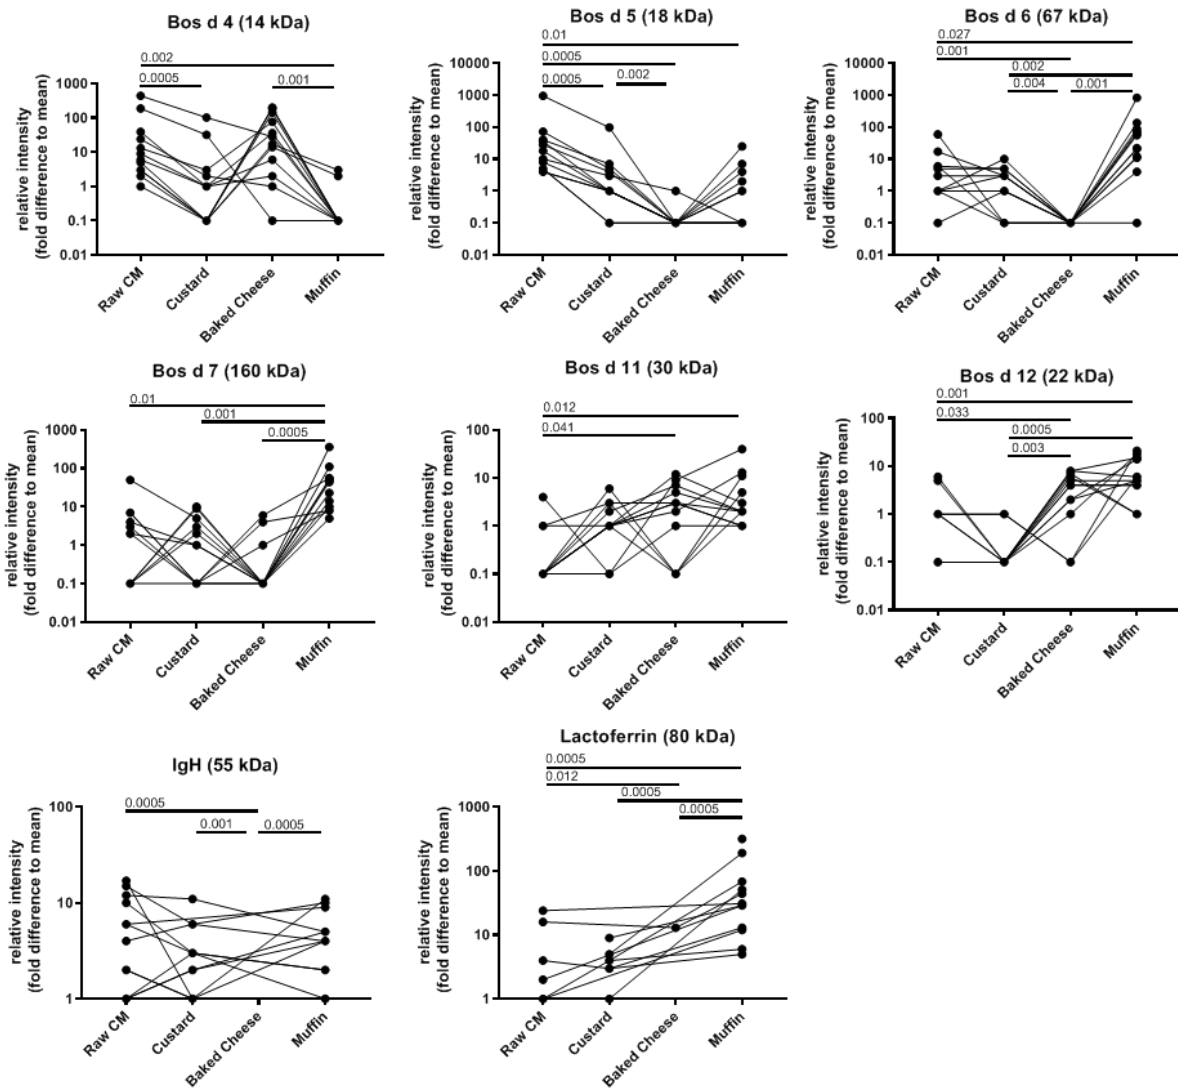

**Figure S1.** Line graphs showing IgE binding (relative intensity) to respective allergens in four extracts, raw CM, custard, baked cheese and muffin (n = 12).

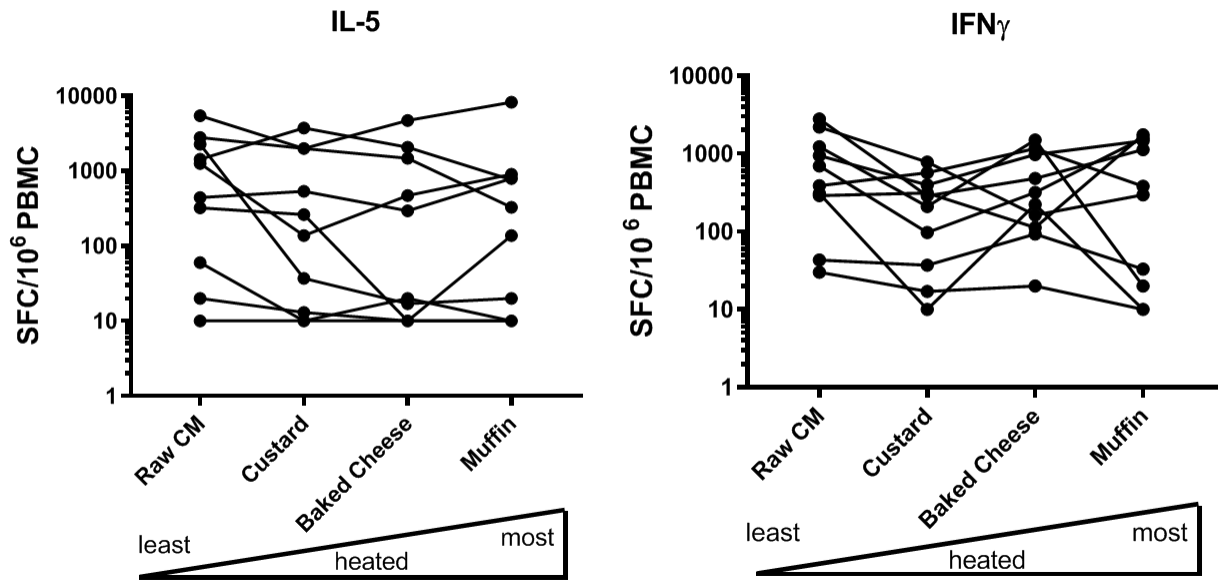

**Figure S2.** Line graphs showing T cell cytokine production (spot-forming cells (SFC)) to four extracts; raw CM, custard, baked cheese and muffin (n = 10).
